# Supplementary material for: Who Is Classified as Untestable on Brief Cognitive Screens in an Acute Stroke Setting?
Source: PubMed Central journal article supplement (PMC6787589; doi:10.3390/diagnostics9030095), 2019-08-14
Supplement: diagnostics-09-00095-s001.pdf [file diagnostics-09-00095-s001.pdf]

Supplementary Materials

**Table 1.** Questions attempted by the partially untestable group ( $n = 58$ ).

| Patient | Age | Time | Date | Place | Two-person recognition | DOB | WW1 | Prime minister | Months backwards | Clock draw | News item | Delayed recall | Fluency |
|---------|-----|------|------|-------|------------------------|-----|-----|----------------|------------------|------------|-----------|----------------|---------|
| 1       | y   | y    | y    | y     | y                      | y   | y   | y              | y                | n          | y         | y              | y       |
| 2       | y   | y    | y    | y     | y                      | y   | y   | y              | n                | y          | y         | y              | y       |
| 3       | y   | y    | y    | y     | y                      | y   | y   | y              | n                | y          | n         | n              | n       |
| 4       | y   | y    | y    | y     | y                      | y   | y   | y              | y                | n          | y         | y              | y       |
| 5       | y   | y    | y    | y     | y                      | y   | y   | y              | y                | n          | y         | y              | y       |
| 6       | y   | n    | n    | n     | n                      | y   | n   | n              | n                | n          | n         | n              | n       |
| 7       | y   | y    | y    | y     | y                      | y   | y   | y              | n                | y          | y         | y              | y       |
| 8       | y   | y    | y    | y     | y                      | y   | y   | y              | y                | n          | n         | n              | n       |
| 9       | y   | n    | y    | y     | n                      | n   | n   | n              | n                | n          | n         | n              | n       |
| 10      | y   | y    | y    | y     | y                      | y   | y   | y              | y                | n          | n         | n              | n       |
| 11      | y   | y    | y    | y     | y                      | y   | n   | n              | n                | y          | n         | n              | n       |
| 12      | y   | y    | y    | y     | y                      | y   | y   | y              | y                | n          | n         | n              | n       |
| 13      | y   | n    | n    | n     | n                      | n   | n   | n              | n                | y          | n         | n              | n       |
| 14      | y   | n    | y    | n     | n                      | n   | n   | n              | n                | n          | n         | n              | n       |
| 15      | y   | y    | y    | n     | n                      | n   | n   | n              | n                | n          | n         | n              | n       |
| 16      | y   | y    | y    | y     | y                      | y   | y   | y              | y                | n          | n         | n              | n       |
| 17      | y   | y    | y    | y     | y                      | y   | n   | n              | n                | n          | n         | n              | n       |
| 18      | y   | y    | y    | y     | y                      | y   | y   | y              | y                | n          | n         | n              | n       |
| 19      | y   | y    | y    | y     | y                      | y   | y   | y              | y                | y          | y         | n              | n       |
| 20      | y   | n    | y    | y     | n                      | y   | n   | n              | n                | n          | n         | n              | n       |
| 21      | y   | y    | y    | y     | y                      | y   | y   | y              | y                | n          | y         | y              | y       |

|    |   |   |   |   |   |   |   |   |   |   |   |   |   |
|----|---|---|---|---|---|---|---|---|---|---|---|---|---|
| 22 | y | n | n | n | n | y | n | n | n | n | n | n | n |
| 23 | y | y | y | y | y | n | n | n | n | n | n | n | n |
| 24 | y | y | y | y | y | y | y | y | y | n | y | y | y |
| 25 | y | y | y | y | y | y | n | n | n | n | n | n | n |
| 26 | y | y | y | y | y | y | y | y | y | n | y | y | y |
| 27 | y | n | y | y | n | y | n | n | n | n | n | n | n |
| 28 | y | y | y | y | n | n | n | n | n | n | n | n | n |
| 29 | y | y | y | y | y | y | y | y | y | n | n | n | n |
| 30 | n | y | n | n | n | n | n | n | n | n | n | n | n |
| 31 | y | y | y | y | y | y | y | y | y | y | y | n | n |
| 32 | y | y | y | y | y | y | y | y | y | n | y | y | y |
| 33 | y | y | n | n | n | n | n | n | n | n | n | n | n |
| 34 | y | y | y | y | y | y | y | y | y | n | y | y | y |
| 35 | y | y | y | y | y | y | y | y | y | n | y | y | y |
| 36 | y | y | y | y | y | y | y | y | y | n | y | y | y |
| 37 | y | y | y | y | y | y | y | y | y | n | y | y | y |
| 38 | y | y | y | y | y | y | y | y | y | n | y | y | y |
| 39 | y | y | y | y | y | y | y | y | y | n | n | n | n |
| 40 | y | y | y | y | y | y | y | y | y | n | y | y | y |
| 41 | y | y | y | y | y | y | y | y | y | n | y | y | y |
| 42 | y | n | n | y | n | y | n | n | n | n | n | n | n |
| 43 | y | y | y | y | y | y | y | y | y | n | y | y | y |
| 44 | y | y | n | n | n | n | n | n | n | n | n | n | n |
| 45 | y | y | y | y | y | y | y | y | y | n | y | y | y |
| 46 | y | y | y | y | y | y | n | n | n | n | n | n | n |
| 47 | y | y | y | y | y | y | y | y | y | n | n | n | n |
| 48 | y | y | y | y | y | y | y | y | y | n | y | y | y |
| 49 | y | y | y | y | y | y | y | y | y | n | y | y | y |
| 50 | y | y | y | y | y | y | y | y | y | n | y | y | y |

|          |    |    |    |    |    |    |    |    |    |   |    |    |    |
|----------|----|----|----|----|----|----|----|----|----|---|----|----|----|
| 51       | y  | y  | y  | y  | y  | y  | y  | y  | y  | n | y  | y  | y  |
| 52       | y  | y  | y  | y  | y  | y  | y  | n  | n  | n | n  | n  | n  |
| 53       | y  | y  | y  | n  | n  | n  | n  | n  | n  | n | n  | n  | n  |
| 54       | y  | y  | y  | y  | y  | y  | y  | y  | y  | n | y  | y  | y  |
| 55       | y  | y  | y  | y  | y  | y  | y  | y  | y  | n | y  | y  | y  |
| 56       | y  | y  | y  | y  | y  | y  | y  | y  | y  | n | y  | y  | y  |
| 57       | y  | y  | y  | y  | y  | y  | y  | y  | y  | n | y  | y  | y  |
| 58       | y  | y  | y  | y  | y  | y  | y  | y  | y  | n | y  | y  | y  |
| Y totals | 57 | 50 | 51 | 49 | 44 | 48 | 39 | 38 | 35 | 7 | 29 | 27 | 27 |
